# Supplementary material for: Substrate-dependent catalytic activity of single-atom Pt for CO oxidation
Source: Royal Society of Chemistry journal article supplement (doi:10.1039/d4ta01702a), 2024-01-01
Supplement: d4ta01702a1.pdf [file d4ta01702a1.pdf]

## Supplementary Information

# Substrate-dependent Catalytic Activity of Single-atom Pt for CO Oxidation

Yuyao Huang<sup>a</sup>, Lu Wang<sup>a, b\*</sup>, and Youyong Li<sup>a, c\*</sup>

<sup>a</sup> Institute of Functional Nano & Soft Materials (FUNSOM), Soochow University, Suzhou, Jiangsu 215123, China.

<sup>b</sup> Jiangsu Key Laboratory of Advanced Negative Carbon Technologies, Soochow University, Suzhou, 215123, Jiangsu, China

<sup>c</sup> Macao Institute of Materials Science and Engineering, Macau University of Science and Technology, Taipa 999078, Macau SAR, China.

Table S1. Binding energy of Pt anchored on SrBO<sub>3</sub> (B = Ag, Co, Cu, Fe, Hf, Mg, Mn, Ni, Sc, Ti, Zr) with different types of surfaces.

| Facet           | Binding Energy of Pt (eV) |                      |                     |                   |                      |                      |
|-----------------|---------------------------|----------------------|---------------------|-------------------|----------------------|----------------------|
|                 | 100                       |                      | 110                 |                   | 111                  |                      |
|                 | SrO                       | BO <sub>2</sub>      | O <sub>2</sub>      | SrBO              | B                    | SrO <sub>3</sub>     |
| Adsorption site | top <sup>O</sup>          | hollow <sup>Sr</sup> | hollow <sup>O</sup> | top <sup>Sr</sup> | hollow <sup>Sr</sup> | hollow <sup>Sr</sup> |
| Ag              | 2.50                      | -3.77                | 0.71                | 0.96              | 3.29                 | 0.87                 |
| Co              | 2.93                      | -1.34                | -1.00               | 2.65              | 5.33                 | -2.38                |
| Cu              | 2.17                      | -3.78                | -3.31               | 1.59              | 5.11                 | -2.65                |
| Fe              | 1.45                      | -0.30                | 0.94                | 2.94              | 5.37                 | 2.92                 |
| Hf              | 2.79                      | 4.43                 | -1.78               | 0.06              | 0.91                 | -2.51                |
| Mg              | 1.82                      | -4.91                | -4.91               | 2.01              | 4.58                 | -4.70                |
| Mn              | 3.14                      | 0.43                 | 1.33                | 6.83              | 3.39                 | 0.94                 |
| Ni              | 2.02                      | -3.42                | -2.29               | 2.60              | 5.55                 | -1.79                |
| Sc              | 1.65                      | -5.08                | -4.37               | 2.58              | 4.20                 | -4.44                |
| Ti              | 2.69                      | 2.51                 | -1.11               | 1.42              | 1.30                 | -0.86                |
| Zr              | 2.86                      | 3.51                 | -3.55               | 0.49              | 1.48                 | -3.34                |

Table S2. Binding energy of Pt and Pt-O distance on Pt-CaBO<sub>3</sub> and Pt-SrBO<sub>3</sub> surfaces.

| B-site elements | Pt-O distance (Å)    |                      |                      | Binding energy of Pt (eV) |                      |                      |
|-----------------|----------------------|----------------------|----------------------|---------------------------|----------------------|----------------------|
|                 | Pt-CaBO <sub>3</sub> | Pt-SrBO <sub>3</sub> | Pt-BaBO <sub>3</sub> | Pt-CaBO <sub>3</sub>      | Pt-SrBO <sub>3</sub> | Pt-BaBO <sub>3</sub> |
| Ag              | -                    | 1.94                 | -                    | □-                        | -3.77                | -                    |
| Al              | -                    | 1.93                 | 1.94                 | □-                        | -2.92                | -3.29                |
| Au              | -                    | 1.97                 | 1.97                 | □-                        | -1.62                | -2.8                 |
| Co              | 1.95                 | 1.95                 | 1.92                 | -1.43                     | -1.34                | -1.71                |
| Cr              | -                    | 2                    | -                    | □-                        | 1.09                 | -                    |
| Cu              | 1.91                 | 1.92                 | 1.92                 | -3.85                     | -3.78                | -4.08                |
| Fe              | 2                    | 2                    | 1.98                 | -0.85                     | -0.3                 | -1.18                |
| Ge              | 2                    | 2                    | 1.99                 | 0.99                      | 0.78                 | -0.41                |
| Hf              | 2.6                  | 2.58                 | 2.52                 | 4.41                      | 4.43                 | 4.54                 |
| Mg              | 1.89                 | 1.91                 | -                    | -4.68                     | -4.91                | -                    |
| Mn              | 1.98                 | 1.99                 | 1.97                 | -0.79                     | 0.43                 | -0.36                |
| Mo              | -                    | 2.93                 | 2.07                 | □-                        | 4.37                 | 4.31                 |
| Ni              | -                    | 1.91                 | 1.92                 | □-                        | -3.42                | -3.6                 |
| Os              | 2.69                 | 2.64                 | 2.03                 | 3.83                      | 4.01                 | 2.85                 |
| Pd              | -                    | 1.94                 | -                    | □-                        | -2.77                | -                    |
| Re              | -                    | 2.84                 | 2.97                 | □-                        | 3.62                 | 4.32                 |
| Ru              | 2.48                 | 2                    | 2.01                 | 3.91                      | 1.35                 | 1.17                 |
| Sc              | -                    | 1.9                  | 1.93                 | -□                        | -5.08                | -4.39                |
| Si              | -                    | 2.51                 | 2                    | -□                        | 5.14                 | 1.05                 |
| Sn              | -                    | 2.02                 | 2.02                 | -□                        | 0.15                 | 0.38                 |
| Ta              | -                    | 3.03                 | 3.03                 | -□                        | 4.10                 | 3.05                 |
| Ti              | 2.03                 | 2.04                 | 2.04                 | 3.62                      | 2.51                 | 3.16                 |
| V               | 2.39                 | 2.03                 | 2.04                 | 4.5                       | 2.48                 | 2.13                 |
| W               | -                    | 3                    | 3.06                 | -                         | 3.45                 | 4.06                 |
| Zn              | -                    | 1.91                 | 1.91                 | -□                        | -4.38                | -4.4                 |
| Zr              | 2.34                 | 2.34                 | 2.37                 | 4.29                      | 3.51                 | 4.26                 |

Table S3. Distance between Pt and CO, C-O bond length in adsorbed CO (CO in gas phase:  $d_{\text{C-O}} = 1.145 \text{ \AA}$ ), adsorption energy of CO on Pt-SrBO<sub>3</sub>, and charge transfer between Pt and C, in the first CO oxidation reaction step.

| B-site elements | $d_{\text{Pt-C}} (\text{\AA})$ | $d_{\text{C-O}} (\text{\AA})$ | $E_{\text{ad}} (\text{eV})$ | Charge transfer (e) |
|-----------------|--------------------------------|-------------------------------|-----------------------------|---------------------|
| Ag              | 1.792                          | 1.166                         | -0.290                      | 0.30                |
| Al              | 1.824                          | 1.167                         | -0.676                      | 0.30                |
| Au              | 1.806                          | 1.165                         | -0.947                      | 0.40                |
| Co              | 1.828                          | 1.170                         | -0.446                      | 0.35                |
| Cu              | 1.816                          | 1.166                         | -0.381                      | 0.23                |
| Fe              | 1.867                          | 1.168                         | -0.627                      | 0.35                |
| Mn              | 1.888                          | 1.168                         | -1.210                      | 0.38                |
| Ni              | 1.833                          | 1.163                         | -0.351                      | 0.21                |
| Pd              | 1.820                          | 1.165                         | -0.137                      | 0.32                |

Table S4. Distance between Pt and CO, C-O bond length in adsorbed CO, O-O bond length in adsorbed O<sub>2</sub> (O<sub>2</sub> in gas phase: d<sub>O-O</sub> = 1.233 Å), and adsorption energy of CO on Pt-SrBO<sub>3</sub>, in the second CO oxidation reaction step.

| B-site elements | d <sub>Pt-C</sub> (Å) | d <sub>C-O</sub> (Å) | d <sub>O-O</sub> (Å) | E <sub>ad</sub> (eV) |
|-----------------|-----------------------|----------------------|----------------------|----------------------|
| Ag              | 1.818                 | 1.166                | 1.388                | -0.61                |
| Al              | 1.822                 | 1.162                | 1.472                | -0.98                |
| Au              | 1.832                 | 1.168                | 1.398                | -1.37                |
| Co              | 1.832                 | 1.167                | 1.398                | -1.48                |
| Cu              | 1.821                 | 1.165                | 1.395                | -0.68                |
| Fe              | 1.827                 | 1.167                | 1.388                | -1.50                |
| Mn              | 1.823                 | 1.168                | 1.424                | -1.70                |
| Ni              | 1.830                 | 1.163                | 1.390                | -0.76                |
| Pd              | 1.839                 | 1.167                | 1.397                | -0.82                |

Table S5. Adsorption energy of CO and O<sub>2</sub> (eV), energy barrier (eV) and tilted angle (°) in the first and second CO oxidation step on Pt-SrBO<sub>3</sub>.

| B-site elements | First Oxidation Step |         |              | Second Oxidation Step            |                     |         |              |
|-----------------|----------------------|---------|--------------|----------------------------------|---------------------|---------|--------------|
|                 | E <sub>a</sub> (CO)  | Barrier | Tilted angle | E <sub>a</sub> (O <sub>2</sub> ) | E <sub>a</sub> (CO) | Barrier | Tilted angle |
| Ag              | -0.29                | -       | 3.8          | -1.09                            | -0.61               | 0.71    | 17.9         |
| Al              | -0.68                | 0.19    | 15.7         | -0.31                            | -0.98               | 1.38    | 20.7         |
| Au              | -0.95                | 0.06    | 10.4         | -0.64                            | -1.37               | 1.09    | 20.0         |
| Co              | -0.45                | 0.13    | 6.2          | -0.55                            | -1.48               | 1.74    | 20.5         |
| Cu              | -0.38                | 0.05    | 11.9         | -0.72                            | -0.68               | 0.88    | 18.2         |
| Fe              | -0.63                | 0.21    | 12.6         | -1.14                            | -1.50               | 1.81    | 22.4         |
| Mn              | -1.21                | 0.09    | 11.2         | -1.03                            | -1.70               | 2.24    | 21.9         |
| Ni              | -0.35                | -       | 6.8          | -1.01                            | -0.76               | 0.64    | 11.8         |
| Pd              | -0.14                | -       | 3.3          | -1.01                            | -0.82               | 0.79    | 17.3         |

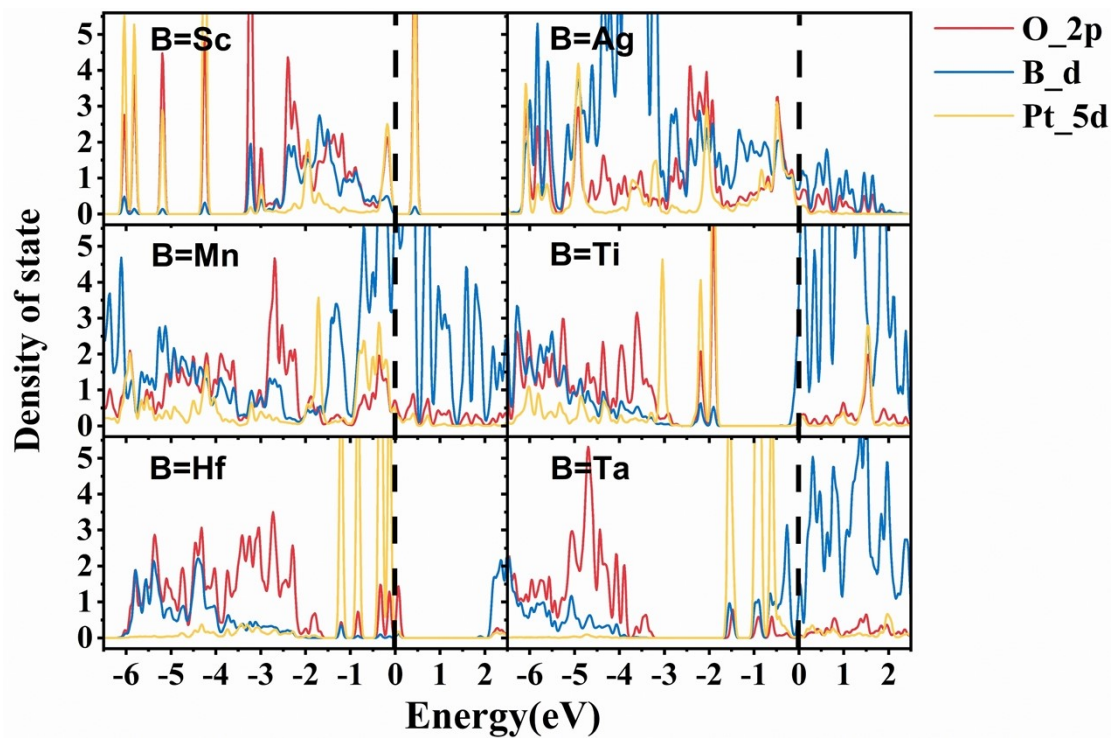

Fig. S1 Projected density of states for Pt-SrBO<sub>3</sub> (B = Sc, Ag, Mn, Ti, Hf, Ta). The red, blue and gold lines represent the partial density of states of O 2*p* orbital, B *d* orbital, and Pt 5*d* orbital, respectively.

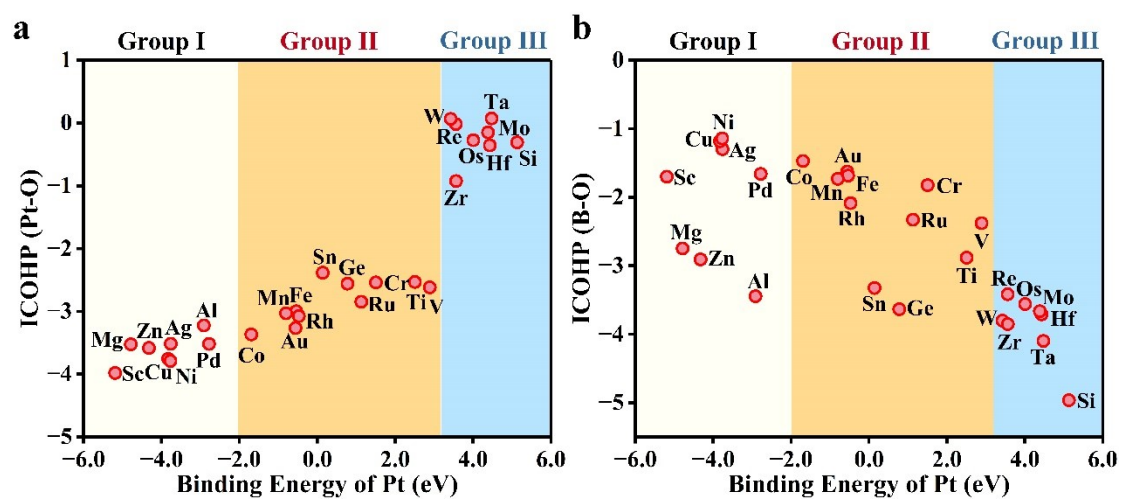

Fig. S2 (a) Relationship between Integrated COHP values (ICOHP) of Pt-O pair and binding energies of Pt. (b) Relationship between ICOHP values of B-O pair (the oxygen that connected to Pt) and binding energies of Pt.



### CO on Group I

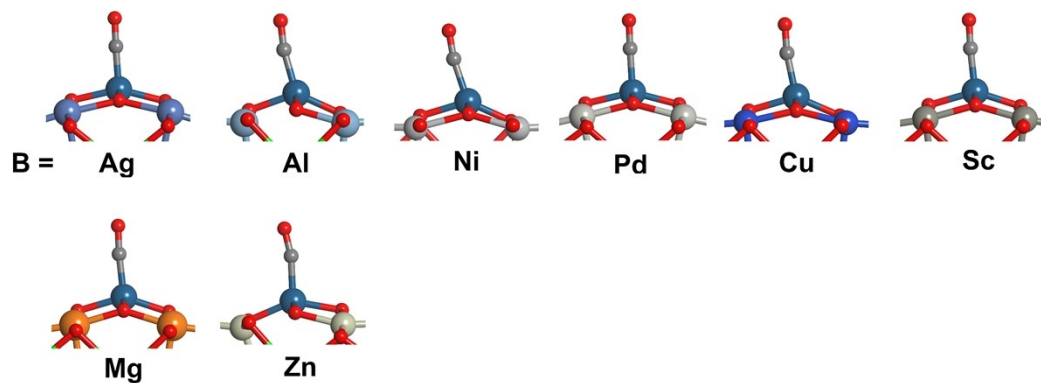

### CO on Group II

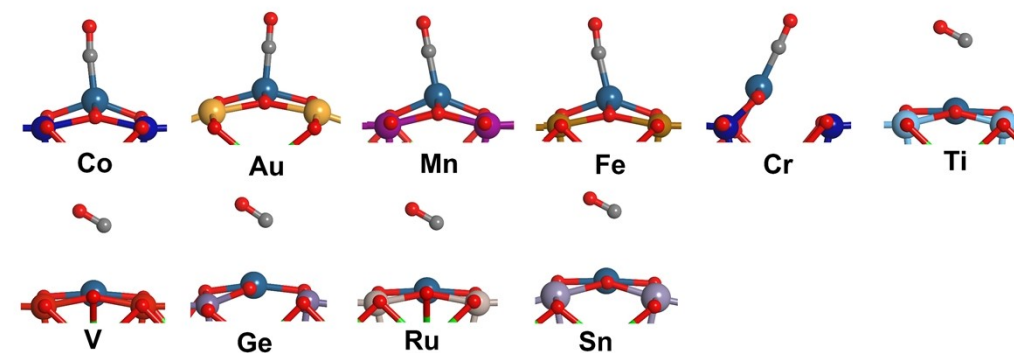

Fig. S3 Optimized configurations of CO adsorbed on Pt site of Pt-SrBO<sub>3</sub> surface in the first oxidation step.

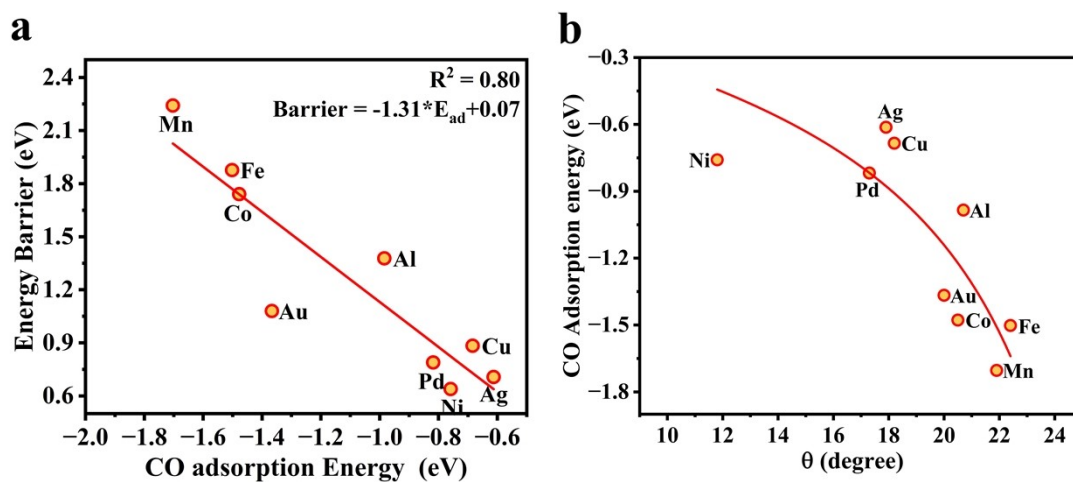

Fig. S4 (a) Relationship between CO adsorption energy and energy barrier in second oxidation step. (b) Relationship between the  $\theta$  (tilted angle between adsorbed CO and z axis) and adsorption energy of CO in the second oxidation step.
